# Supplementary material for: Social networks and cognitive function in older adults: findings from the HAPIEE study
Source: PubMed Central journal article supplement (PMC8524850; doi:10.1186/s12877-021-02531-0), 2021-10-18
Supplement: 12877_2021_2531_MOESM1_ESM.pdf [file 12877_2021_2531_MOESM1_ESM.pdf]

**Additional File 1. Distribution of years of follow-up in the main analytic sample for contact frequency and participation in social activities (n=6,691)**

| Years of follow-up | % (n)          |               |               |               |
|--------------------|----------------|---------------|---------------|---------------|
|                    | Czech Republic | Poland        | Russia        | Total         |
| 1                  | 0              | 0             | 0.21 (5)      | 0.07 (5)      |
| 2                  | 4.21 (87)      | 0             | 21.52 (506)   | 8.86 (593)    |
| 3                  | 42.76 (883)    | 7.12 (162)    | 57.55 (1,353) | 35.84 (2,398) |
| 4                  | 52.30 (1,080)  | 88.13 (2,005) | 16.38 (385)   | 51.86 (3,470) |
| 5                  | 0.73 (15)      | 4.75 (108)    | 4.13 (97)     | 3.29 (220)    |
| 6                  | 0              | 0             | 0.21 (5)      | 0.07 (5)      |
| Total % (n)        | 100 (2,065)    | 100 (2,275)   | 100 (2,351)   | 100 (6,691)   |
