# Supplementary material for: Social networks and cognitive function in older adults: findings from the HAPIEE study
Source: PubMed Central journal article supplement (PMC8524850; doi:10.1186/s12877-021-02531-0), 2021-10-18
Supplement: 12877_2021_2531_MOESM2_ESM.pdf [file 12877_2021_2531_MOESM2_ESM.pdf]

**Additional File 2. Comparison of cognitive functions and social network characteristics between HAPIEE cohorts**

|                                                               | Mean or % of total sample | Mean or % difference from total sample |        |        | P-value of country differences* |
|---------------------------------------------------------------|---------------------------|----------------------------------------|--------|--------|---------------------------------|
|                                                               |                           | Czech Republic                         | Poland | Russia |                                 |
| <i>Cognitive function at follow-up (2006/2008)</i>            |                           |                                        |        |        |                                 |
| Immediate recall (0-30)                                       | 22.0                      | 1.0                                    | -1.6   | 0.7    | P<0.001                         |
| Delayed recall (0-10)                                         | 7.6                       | 0.1                                    | -0.8   | 0.5    | P<0.001                         |
| Verbal fluency                                                | 22.5                      | 1.1                                    | -1.6   | 0.4    | P<0.001                         |
| Processing speed (0-65)                                       | 17.3                      | 0.5                                    | -0.7   | 0.3    | P<0.001                         |
| <i>Cognitive function at baseline (2002/2005)</i>             |                           |                                        |        |        |                                 |
| Immediate recall (0-30)                                       | 20.8                      | 2.0                                    | -1.8   | -0.3   | P<0.001                         |
| Delayed recall (0-10)                                         | 7.0                       | 0.7                                    | -0.3   | -0.3   | P<0.001                         |
| Verbal fluency                                                | 20.6                      | 3.0                                    | -1.2   | -1.5   | P<0.001                         |
| Processing speed (0-65)                                       | 17.7                      | 0.5                                    | -0.1   | -0.3   | P<0.001                         |
| <i>Social network characteristics at baseline (2002/2005)</i> |                           |                                        |        |        |                                 |
| Network size of friends**                                     |                           |                                        |        |        | P<0.001                         |
| None                                                          | 46.5%                     |                                        | -16.9  | 16.3   |                                 |
| 1 or 2                                                        | 35.3%                     |                                        | 15.8   | -15.4  |                                 |
| 3 to 5                                                        | 14.3%                     |                                        | 0.5    | -0.6   |                                 |
| More than 5                                                   | 4.0%                      |                                        | 0.5    | -0.5   |                                 |
| Network size of relatives**                                   |                           | Not available                          |        |        | P<0.001                         |
| None                                                          | 40.5%                     |                                        | -8.9   | 8.6    |                                 |
| 1 or 2                                                        | 35.3%                     |                                        | 7.8    | -7.5   |                                 |
| 3 to 5                                                        | 20.6%                     |                                        | 0.6    | -0.6   |                                 |
| More than 5                                                   | 3.6%                      |                                        | 0.5    | -0.5   |                                 |
| Contact frequency with friends                                |                           |                                        |        |        | P<0.001                         |
| No friends                                                    | 6.7%                      | -4.9                                   | 0.3    | 3.9    |                                 |
| Less than once a month                                        | 26.7%                     | -6.5                                   | 4.8    | 1.3    |                                 |
| About once a month                                            | 21.7%                     | 1.1                                    | 0.1    | -1.2   |                                 |
| Several times a month                                         | 16.3%                     | 7.7                                    | 0.8    | -7.7   |                                 |
| About once a week                                             | 16.4%                     | 3.8                                    | -1.5   | -1.8   |                                 |
| Several times a week                                          | 12.2%                     | -1.2                                   | -4.5   | 5.5    |                                 |
| Contact frequency with relatives                              |                           |                                        |        |        | P<0.001                         |
| No relatives                                                  | 2.6%                      | -1.8                                   | 0.8    | 0.7    |                                 |
| Less than once a month                                        | 18.6%                     | -9.7                                   | 7.8    | 0.9    |                                 |
| About once a month                                            | 14.1%                     | -4.6                                   | 4.8    | -0.5   |                                 |
| Several times a month                                         | 14.5%                     | 2.1                                    | 4.3    | -6.0   |                                 |
| About once a week                                             | 24.5%                     | 2.8                                    | -6.1   | 3.4    |                                 |
| Several times a week                                          | 25.8%                     | 11.1                                   | -11.6  | 1.5    |                                 |
| Participation in social activities                            |                           |                                        |        |        | P<0.001                         |
| Never or not a member                                         | 81.8%                     | -13.8                                  | 4.9    | 7.4    |                                 |
| At least several times a year                                 | 8.8%                      | 6.4                                    | -2.0   | -3.8   |                                 |
| Several times a month or more                                 | 9.4%                      | 7.4                                    | -2.9   | -3.6   |                                 |

\*Country differences in mean cognitive function and proportion of social networks were compared using one-way analysis of variance and chi-squared tests, respectively.

\*\*As data on social network size were not collected in the Czech Republic, a sub-sample was used for the analyses on social network size using data from Poland and Russia.
