# Supplementary material for: Social networks and cognitive function in older adults: findings from the HAPIEE study
Source: PubMed Central journal article supplement (PMC8524850; doi:10.1186/s12877-021-02531-0), 2021-10-18
Supplement: 12877_2021_2531_MOESM3_ESM.pdf [file 12877_2021_2531_MOESM3_ESM.pdf]

### Additional File 3. Cross-sectional associations of social network characteristics with specific cognitive functions

|                                    |                               | Model 1*  |              | Model 2†  |             |
|------------------------------------|-------------------------------|-----------|--------------|-----------|-------------|
|                                    |                               | b         | 95% CI       | b         | 95% CI      |
| <b>Immediate word recall</b>       |                               |           |              |           |             |
| Network size - Friends             | None                          | -0.01     | -0.08, 0.05  | 0.00      | -0.06, 0.06 |
|                                    | 1 or 2                        | Reference |              | Reference |             |
|                                    | 3 to 5                        | 0.05      | 0.04, 0.13   | 0.06      | -0.02, 0.13 |
|                                    | More than 5                   | 0.18      | 0.05, 0.32   | 0.13      | -0.00, 0.26 |
|                                    | <i>P-trend</i>                | 0.007     |              | 0.046     |             |
| Network size - Relatives           | None                          | 0.03      | -0.03, 0.09  | 0.05      | -0.01, 0.11 |
|                                    | 1 or 2                        | Reference |              | Reference |             |
|                                    | 3 to 5                        | 0.02      | -0.05, 0.10  | 0.04      | -0.03, 0.11 |
|                                    | More than 5                   | 0.04      | -0.10, 0.19  | 0.01      | -0.12, 0.15 |
|                                    | <i>P-trend</i>                | 0.807     |              | 0.528     |             |
| Contact frequency - Friends        | No friends                    | -0.11     | -0.18, -0.04 | 0.04      | -0.05, 0.12 |
|                                    | Less than once a month        | Reference |              | Reference |             |
|                                    | About once a month            | 0.05      | -0.01, 0.11  | 0.03      | -0.03, 0.08 |
|                                    | Several times a month         | 0.03      | -0.04, 0.09  | 0.00      | -0.06, 0.07 |
|                                    | About once a week             | 0.05      | -0.01, 0.11  | 0.06      | -0.00, 0.12 |
|                                    | Several times a week          | -0.02     | -0.10, 0.05  | 0.01      | -0.05, 0.08 |
|                                    | <i>P-trend</i>                | 0.287     |              | 0.444     |             |
| Contact frequency - Relatives      | No relatives                  | -0.01     | -0.15, 0.12  | -0.01     | -0.14, 0.12 |
|                                    | Less than once a month        | Reference |              | Reference |             |
|                                    | About once a month            | -0.05     | -0.12, 0.02  | -0.04     | -0.10, 0.03 |
|                                    | Several times a month         | 0.08      | 0.01, 0.16   | 0.07      | 0.00, 0.14  |
|                                    | About once a week             | 0.01      | -0.05, 0.08  | 0.01      | -0.05, 0.08 |
|                                    | Several times a week          | 0.03      | -0.03, 0.10  | 0.01      | -0.05, 0.07 |
|                                    | <i>P-trend</i>                | 0.147     |              | 0.452     |             |
| Participation in social activities | Never or not a member         | Reference |              | Reference |             |
|                                    | At least several times a year | 0.15      | 0.07, 0.22   | 0.03      | -0.04, 0.10 |
|                                    | Several times a month or more | 0.25      | 0.18, 0.32   | 0.13      | 0.06, 0.19  |
|                                    | <i>P-trend</i>                | <0.001    |              | <0.001    |             |
| <b>Delayed word recall</b>         |                               |           |              |           |             |
| Network size - Friends             | None                          | 0.02      | -0.05, 0.08  | 0.03      | -0.03, 0.09 |
|                                    | 1 or 2                        | Reference |              | Reference |             |
|                                    | 3 to 5                        | 0.05      | -0.04, 0.13  | 0.05      | -0.04, 0.13 |
|                                    | More than 5                   | -0.04     | -0.18, 0.10  | -0.09     | -0.22, 0.05 |
|                                    | <i>P-trend</i>                | 0.954     |              | 0.429     |             |
| Network size - Relatives           | None                          | 0.01      | -0.05, 0.07  | 0.02      | -0.04, 0.08 |
|                                    | 1 or 2                        | Reference |              | Reference |             |
|                                    | 3 to 5                        | 0.04      | -0.04, 0.11  | 0.04      | -0.03, 0.12 |
|                                    | More than 5                   | 0.09      | -0.06, 0.23  | 0.05      | -0.09, 0.20 |
|                                    | <i>P-trend</i>                | 0.343     |              | 0.573     |             |
| Contact frequency - Friends        | No friends                    | -0.06     | -0.13, 0.01  | 0.04      | -0.05, 0.13 |
|                                    | Less than once a month        | Reference |              | Reference |             |
|                                    | About once a month            | 0.09      | 0.03, 0.15   | 0.07      | 0.01, 0.13  |
|                                    | Several times a month         | -0.01     | -0.07, 0.06  | -0.02     | -0.09, 0.05 |
|                                    | About once a week             | 0.01      | -0.05, 0.08  | 0.02      | -0.04, 0.09 |
|                                    | Several times a week          | -0.04     | -0.11, 0.04  | -0.01     | -0.08, 0.07 |
|                                    | <i>P-trend</i>                | 0.665     |              | 0.488     |             |
| Contact frequency - Relatives      | No relatives                  | -0.04     | -0.18, 0.10  | -0.04     | -0.18, 0.10 |
|                                    | Less than once a month        | Reference |              | Reference |             |
|                                    | About once a month            | -0.03     | -0.11, 0.04  | -0.02     | -0.10, 0.05 |
|                                    | Several times a month         | 0.06      | -0.02, 0.14  | 0.05      | -0.03, 0.12 |
|                                    | About once a week             | 0.04      | -0.03, 0.11  | 0.05      | -0.02, 0.11 |
|                                    | Several times a week          | 0.05      | -0.02, 0.12  | 0.03      | -0.04, 0.10 |
|                                    | <i>P-trend</i>                | 0.028     |              | 0.098     |             |

|                                    |                               | Model 1*  |              | Model 2†  |             |
|------------------------------------|-------------------------------|-----------|--------------|-----------|-------------|
|                                    |                               | b         | 95% CI       | b         | 95% CI      |
| Participation in social activities | Never or not a member         | Reference |              | Reference |             |
|                                    | At least several times a year | 0.08      | 0.00, 0.16   | -0.01     | -0.08, 0.07 |
|                                    | Several times a month or more | 0.17      | 0.10, 0.25   | 0.08      | 0.01, 0.15  |
|                                    | <i>P-trend</i>                | <0.001    |              | 0.063     |             |
| <b>Verbal fluency</b>              |                               |           |              |           |             |
| Network size - Friends             | None                          | 0.01      | -0.08, 0.11  | 0.03      | -0.06, 0.12 |
|                                    | 1 or 2                        | Reference |              | Reference |             |
|                                    | 3 to 5                        | 0.14      | 0.02, 0.27   | 0.13      | 0.01, 0.26  |
|                                    | More than 5                   | 0.28      | 0.07, 0.49   | 0.21      | 0.00, 0.41  |
|                                    | <i>P-trend</i>                | 0.006     |              | 0.047     |             |
| Network size - Relatives           | None                          | 0.04      | -0.06, 0.13  | 0.05      | -0.04, 0.14 |
|                                    | 1 or 2                        | Reference |              | Reference |             |
|                                    | 3 to 5                        | 0.05      | -0.06, 0.16  | 0.05      | -0.05, 0.16 |
|                                    | More than 5                   | 0.34      | 0.12, 0.56   | 0.29      | 0.07, 0.50  |
|                                    | <i>P-trend</i>                | 0.157     |              | 0.304     |             |
| Contact frequency - Friends        | No friends                    | -0.21     | -0.32, -0.11 | -0.04     | -0.18, 0.10 |
|                                    | Less than once a month        | Reference |              | Reference |             |
|                                    | About once a month            | 0.07      | -0.03, 0.17  | 0.03      | -0.06, 0.12 |
|                                    | Several times a month         | 0.09      | -0.02, 0.20  | 0.06      | -0.05, 0.16 |
|                                    | About once a week             | 0.03      | -0.08, 0.13  | 0.04      | -0.07, 0.14 |
|                                    | Several times a week          | -0.04     | -0.16, 0.07  | 0.00      | -0.11, 0.12 |
| <i>P-trend</i>                     | 0.275                         |           | 0.443        |           |             |
| Contact frequency - Relatives      | No relatives                  | -0.03     | -0.26, 0.19  | -0.05     | -0.27, 0.16 |
|                                    | Less than once a month        | Reference |              | Reference |             |
|                                    | About once a month            | -0.02     | -0.14, 0.10  | 0.01      | -0.11, 0.12 |
|                                    | Several times a month         | 0.15      | 0.03, 0.27   | 0.13      | 0.02, 0.25  |
|                                    | About once a week             | 0.06      | -0.04, 0.17  | 0.08      | -0.03, 0.18 |
|                                    | Several times a week          | 0.02      | -0.09, 0.13  | -0.01     | -0.12, 0.09 |
| <i>P-trend</i>                     | 0.333                         |           | 0.705        |           |             |
| Participation in social activities | Never or not a member         | Reference |              | Reference |             |
|                                    | At least several times a year | 0.41      | 0.29, 0.53   | 0.25      | 0.14, 0.37  |
|                                    | Several times a month or more | 0.35      | 0.23, 0.46   | 0.18      | 0.06, 0.29  |
|                                    | <i>P-trend</i>                | <0.001    |              | <0.001    |             |
| <b>Processing speed</b>            |                               |           |              |           |             |
| Network size - Friends             | None                          | 0.02      | -0.05, 0.09  | 0.02      | -0.05, 0.09 |
|                                    | 1 or 2                        | Reference |              | Reference |             |
|                                    | 3 to 5                        | 0.10      | 0.01, 0.19   | 0.10      | 0.01, 0.20  |
|                                    | More than 5                   | 0.31      | 0.15, 0.47   | 0.27      | 0.12, 0.43  |
|                                    | <i>P-trend</i>                | 0.002     |              | 0.005     |             |
| Network size - Relatives           | None                          | -0.07     | -0.14, -0.00 | -0.06     | -0.13, 0.01 |
|                                    | 1 or 2                        | Reference |              | Reference |             |
|                                    | 3 to 5                        | 0.07      | -0.02, 0.15  | 0.08      | -0.00, 0.16 |
|                                    | More than 5                   | 0.15      | -0.01, 0.32  | 0.14      | -0.02, 0.30 |
|                                    | <i>P-trend</i>                | <0.001    |              | <0.001    |             |
| Contact frequency - Friends        | No friends                    | -0.14     | -0.21, -0.06 | 0.00      | -0.10, 0.10 |
|                                    | Less than once a month        | Reference |              | Reference |             |
|                                    | About once a month            | 0.04      | -0.03, 0.10  | 0.02      | -0.05, 0.09 |
|                                    | Several times a month         | -0.01     | -0.09, 0.06  | -0.02     | -0.09, 0.06 |
|                                    | About once a week             | -0.03     | -0.11, 0.04  | -0.01     | -0.09, 0.06 |
|                                    | Several times a week          | -0.02     | -0.10, 0.06  | 0.03      | -0.05, 0.11 |
| <i>P-trend</i>                     | 0.963                         |           | 0.821        |           |             |
| Contact frequency - Relatives      | No relatives                  | 0.03      | -0.12, 0.19  | 0.04      | -0.11, 0.20 |
|                                    | Less than once a month        | Reference |              | Reference |             |
|                                    | About once a month            | 0.05      | -0.04, 0.13  | 0.05      | -0.03, 0.13 |
|                                    | Several times a month         | 0.12      | 0.04, 0.20   | 0.11      | 0.03, 0.19  |
|                                    | About once a week             | 0.08      | 0.01, 0.15   | 0.08      | 0.01, 0.16  |
|                                    | Several times a week          | 0.11      | 0.03, 0.18   | 0.09      | 0.02, 0.16  |
| <i>P-trend</i>                     | 0.006                         |           | 0.019        |           |             |

|                                          |                               | <b>Model 1*</b> |               | <b>Model 2†</b> |               |
|------------------------------------------|-------------------------------|-----------------|---------------|-----------------|---------------|
|                                          |                               | <b>b</b>        | <b>95% CI</b> | <b>b</b>        | <b>95% CI</b> |
| Participation<br>in social<br>activities | Never or not a member         | Reference       |               | Reference       |               |
|                                          | At least several times a year | 0.11            | 0.02, 0.19    | 0.01            | -0.07, 0.09   |
|                                          | Several times a month or more | 0.13            | 0.04, 0.21    | 0.02            | -0.06, 0.10   |
|                                          | <i>P-trend</i>                | <0.001          |               | 0.574           |               |

\*Adjusted for country, age and sex.

†Adjusted for country, age, sex, education, household amenities, work status, marital status, smoking status, alcohol drinking frequency, alcohol intake, physical activity, self-rated health, number of chronic diseases and depressive symptoms.
