# Supplementary material for: Social networks and cognitive function in older adults: findings from the HAPIEE study
Source: PubMed Central journal article supplement (PMC8524850; doi:10.1186/s12877-021-02531-0), 2021-10-18
Supplement: 12877_2021_2531_MOESM4_ESM.pdf [file 12877_2021_2531_MOESM4_ESM.pdf]

### Additional File 4. Prospective associations of social network characteristics with specific cognitive functions

|                                    |                               | Model 1*  |              | Model 2†  |              | Model 3‡  |             |
|------------------------------------|-------------------------------|-----------|--------------|-----------|--------------|-----------|-------------|
|                                    |                               | b         | 95% CI       | b         | 95% CI       | b         | 95% CI      |
| <b>Immediate word recall</b>       |                               |           |              |           |              |           |             |
| Network size - Friends             | None                          | -0.03     | -0.09, 0.04  | -0.03     | -0.09, 0.03  | -0.02     | -0.08, 0.04 |
|                                    | 1 or 2                        | Reference |              | Reference |              | Reference |             |
|                                    | 3 to 5                        | 0.02      | -0.07, 0.11  | -0.01     | -0.09, 0.07  | 0.01      | -0.07, 0.09 |
|                                    | More than 5                   | 0.12      | -0.03, 0.26  | 0.03      | -0.11, 0.17  | 0.02      | -0.12, 0.15 |
|                                    | <i>P-trend</i>                | 0.065     |              | 0.378     |              | 0.444     |             |
| Network size - Relatives           | None                          | -0.04     | -0.10, 0.03  | -0.05     | -0.11, 0.01  | -0.04     | -0.10, 0.02 |
|                                    | 1 or 2                        | Reference |              | Reference |              | Reference |             |
|                                    | 3 to 5                        | -0.02     | -0.10, 0.05  | -0.03     | -0.10, 0.04  | -0.02     | -0.09, 0.05 |
|                                    | More than 5                   | 0.08      | -0.07, 0.24  | 0.07      | -0.07, 0.21  | 0.05      | -0.08, 0.19 |
|                                    | <i>P-trend</i>                | 0.249     |              | 0.133     |              | 0.237     |             |
| Contact frequency - Friends        | No friends                    | -0.18     | -0.28, -0.09 | -0.14     | -0.23, -0.05 | -0.05     | -0.13, 0.04 |
|                                    | Less than once a month        | Reference |              | Reference |              | Reference |             |
|                                    | About once a month            | 0.05      | -0.01, 0.12  | 0.02      | -0.03, 0.08  | 0.02      | -0.04, 0.07 |
|                                    | Several times a month         | -0.01     | -0.08, 0.06  | -0.02     | -0.08, 0.04  | -0.02     | -0.09, 0.04 |
|                                    | About once a week             | 0.01      | -0.06, 0.09  | -0.01     | -0.08, 0.05  | 0.01      | -0.05, 0.07 |
|                                    | Several times a week          | -0.03     | -0.11, 0.05  | -0.02     | -0.09, 0.05  | 0.02      | -0.05, 0.09 |
|                                    | <i>P-trend</i>                | 0.335     |              | 0.585     |              | 0.389     |             |
| Contact frequency - Relatives      | No relatives                  | -0.06     | -0.21, 0.09  | -0.07     | -0.20, 0.07  | -0.05     | -0.18, 0.08 |
|                                    | Less than once a month        | Reference |              | Reference |              | Reference |             |
|                                    | About once a month            | -0.09     | -0.16, -0.01 | -0.06     | -0.13, 0.01  | -0.06     | -0.12, 0.01 |
|                                    | Several times a month         | 0.07      | -0.01, 0.15  | 0.03      | -0.04, 0.10  | 0.03      | -0.04, 0.10 |
|                                    | About once a week             | -0.02     | -0.10, 0.05  | -0.03     | -0.09, 0.04  | -0.02     | -0.09, 0.04 |
|                                    | Several times a week          | -0.01     | -0.08, 0.07  | -0.02     | -0.08, 0.04  | -0.03     | -0.10, 0.03 |
|                                    | <i>P-trend</i>                | 0.605     |              | 0.953     |              | 0.570     |             |
| Participation in social activities | Never or not a member         | Reference |              | Reference |              | Reference |             |
|                                    | At least several times a year | 0.17      | 0.09, 0.25   | 0.10      | 0.03, 0.18   | 0.03      | -0.04, 0.10 |
|                                    | Several times a month or more | 0.20      | 0.13, 0.28   | 0.09      | 0.22, 0.16   | 0.01      | -0.06, 0.08 |
|                                    | <i>P-trend</i>                | <0.001    |              | 0.002     |              | 0.665     |             |
| <b>Delayed word recall</b>         |                               |           |              |           |              |           |             |
| Network size - Friends             | None                          | -0.03     | -0.10, 0.03  | -0.04     | -0.10, 0.02  | -0.03     | -0.10, 0.03 |
|                                    | 1 or 2                        | Reference |              | Reference |              | Reference |             |
|                                    | 3 to 5                        | 0.03      | -0.06, 0.12  | 0.01      | -0.07, 0.10  | 0.02      | -0.06, 0.10 |
|                                    | More than 5                   | 0.07      | -0.08, 0.21  | 0.09      | -0.05, 0.22  | 0.05      | -0.08, 0.19 |
|                                    | <i>P-trend</i>                | 0.057     |              | 0.038     |              | 0.086     |             |
| Network size - Relatives           | None                          | -0.01     | -0.08, 0.05  | -0.02     | -0.08, 0.04  | -0.01     | -0.07, 0.05 |
|                                    | 1 or 2                        | Reference |              | Reference |              | Reference |             |
|                                    | 3 to 5                        | 0.01      | -0.07, 0.09  | -0.00     | -0.07, 0.07  | 0.00      | -0.07, 0.07 |
|                                    | More than 5                   | 0.04      | -0.11, 0.19  | 0.02      | -0.12, 0.16  | 0.01      | -0.13, 0.15 |
|                                    | <i>P-trend</i>                | 0.452     |              | 0.396     |              | 0.644     |             |
| Contact frequency - Friends        | No friends                    | -0.16     | -0.26, -0.06 | -0.13     | -0.22, -0.04 | -0.06     | -0.15, 0.03 |
|                                    | Less than once a month        | Reference |              | Reference |              | Reference |             |
|                                    | About once a month            | 0.05      | -0.02, 0.12  | 0.01      | -0.05, 0.07  | 0.00      | -0.06, 0.06 |
|                                    | Several times a month         | -0.01     | -0.08, 0.06  | -0.01     | -0.07, 0.06  | -0.02     | -0.08, 0.05 |
|                                    | About once a week             | 0.05      | -0.03, 0.12  | 0.04      | -0.03, 0.10  | 0.05      | -0.02, 0.11 |
|                                    | Several times a week          | -0.03     | -0.11, 0.05  | -0.02     | -0.09, 0.05  | 0.01      | -0.06, 0.08 |
|                                    | <i>P-trend</i>                | 0.206     |              | 0.127     |              | 0.139     |             |
| Contact frequency - Relatives      | No relatives                  | -0.03     | -0.18, 0.12  | -0.02     | -0.16, 0.11  | -0.02     | -0.15, 0.12 |
|                                    | Less than once a month        | Reference |              | Reference |              | Reference |             |
|                                    | About once a month            | -0.07     | -0.15, 0.01  | -0.05     | -0.13, 0.02  | -0.05     | -0.12, 0.02 |
|                                    | Several times a month         | 0.06      | -0.02, 0.14  | 0.04      | -0.03, 0.11  | 0.03      | -0.04, 0.11 |
|                                    | About once a week             | -0.01     | -0.08, 0.06  | -0.02     | -0.09, 0.04  | -0.02     | -0.08, 0.04 |
|                                    | Several times a week          | -0.00     | -0.08, 0.07  | -0.02     | -0.09, 0.04  | -0.03     | -0.10, 0.03 |
|                                    | <i>P-trend</i>                | 0.655     |              | 0.765     |              | 0.464     |             |

|                                    |                               | Model 1*  |              | Model 2†  |              | Model 3‡  |              |
|------------------------------------|-------------------------------|-----------|--------------|-----------|--------------|-----------|--------------|
|                                    |                               | b         | 95% CI       | b         | 95% CI       | b         | 95% CI       |
| Participation in social activities | Never or not a member         | Reference |              | Reference |              | Reference |              |
|                                    | At least several times a year | 0.14      | 0.06, 0.22   | 0.11      | 0.03, 0.18   | 0.04      | -0.03, 0.12  |
|                                    | Several times a month or more | 0.18      | 0.10, 0.26   | 0.10      | 0.03, 0.18   | 0.04      | -0.04, 0.11  |
|                                    | <i>P-trend</i>                | <0.001    |              | <0.001    |              | 0.202     |              |
| <b>Verbal fluency</b>              |                               |           |              |           |              |           |              |
| Network size - Friends             | None                          | -0.00     | -0.07, 0.07  | 0.00      | -0.06, 0.06  | -0.01     | -0.07, 0.05  |
|                                    | 1 or 2                        | Reference |              | Reference |              | Reference |              |
|                                    | 3 to 5                        | 0.01      | -0.08, 0.10  | -0.03     | -0.11, 0.06  | -0.02     | -0.11, 0.06  |
|                                    | More than 5                   | 0.12      | -0.03, 0.28  | 0.05      | -0.10, 0.19  | 0.02      | -0.12, 0.16  |
|                                    | <i>P-trend</i>                | 0.261     |              | 0.923     |              | 0.875     |              |
| Network size - Relatives           | None                          | 0.07      | 0.00, 0.14   | 0.06      | -0.00, 0.12  | 0.06      | -0.00, 0.12  |
|                                    | 1 or 2                        | Reference |              | Reference |              | Reference |              |
|                                    | 3 to 5                        | 0.05      | -0.03, 0.13  | 0.04      | -0.04, 0.11  | 0.04      | -0.03, 0.12  |
|                                    | More than 5                   | 0.10      | -0.06, 0.26  | 0.01      | -0.13, -0.16 | -0.00     | -0.15, 0.14  |
|                                    | <i>P-trend</i>                | 0.677     |              | 0.324     |              | 0.350     |              |
| Contact frequency - Friends        | No friends                    | -0.04     | -0.14, 0.06  | 0.03      | -0.06, 0.12  | 0.09      | -0.00, 0.18  |
|                                    | Less than once a month        | Reference |              | Reference |              | Reference |              |
|                                    | About once a month            | 0.07      | -0.00, 0.13  | 0.03      | -0.03, 0.09  | 0.04      | -0.02, 0.10  |
|                                    | Several times a month         | 0.02      | -0.06, 0.09  | -0.03     | -0.09, 0.04  | -0.01     | -0.07, 0.06  |
|                                    | About once a week             | 0.02      | -0.05, 0.10  | 0.00      | -0.07, 0.07  | 0.04      | -0.03, 0.10  |
|                                    | Several times a week          | -0.04     | -0.12, 0.04  | -0.03     | -0.10, 0.05  | 0.01      | -0.06, 0.09  |
| <i>P-trend</i>                     | 0.621                         |           | 0.241        |           | 0.629        |           |              |
| Contact frequency - Relatives      | No relatives                  | 0.09      | -0.07, 0.24  | 0.09      | -0.05, 0.23  | 0.09      | -0.05, 0.22  |
|                                    | Less than once a month        | Reference |              | Reference |              | Reference |              |
|                                    | About once a month            | -0.05     | -0.14, 0.03  | -0.04     | -0.12, 0.03  | -0.04     | -0.11, 0.04  |
|                                    | Several times a month         | -0.03     | -0.11, 0.05  | -0.07     | -0.15, 0.00  | -0.07     | -0.14, 0.00  |
|                                    | About once a week             | -0.12     | -0.20, -0.05 | -0.14     | -0.20, -0.07 | -0.13     | -0.19, -0.06 |
|                                    | Several times a week          | 0.03      | -0.05, 0.10  | 0.02      | -0.05, 0.09  | 0.00      | -0.06, 0.07  |
| <i>P-trend</i>                     | 0.637                         |           | 0.271        |           | 0.156        |           |              |
| Participation in social activities | Never or not a member         | Reference |              | Reference |              | Reference |              |
|                                    | At least several times a year | 0.17      | 0.01, 0.26   | 0.06      | -0.02, 0.13  | 0.00      | -0.07, 0.08  |
|                                    | Several times a month or more | 0.18      | 0.10, 0.26   | 0.08      | 0.01, 0.16   | 0.01      | -0.06, 0.09  |
|                                    | <i>P-trend</i>                | <0.001    |              | 0.012     |              | 0.708     |              |
| <b>Processing speed</b>            |                               |           |              |           |              |           |              |
| Network size - Friends             | None                          | -0.03     | -0.10, 0.03  | -0.03     | -0.09, 0.03  | -0.04     | -0.10, 0.02  |
|                                    | 1 or 2                        | Reference |              | Reference |              | Reference |              |
|                                    | 3 to 5                        | -0.00     | -0.09, 0.08  | -0.04     | -0.12, 0.04  | -0.03     | -0.11, 0.05  |
|                                    | More than 5                   | -0.03     | -0.18, 0.11  | -0.14     | -0.27, -0.00 | -0.15     | -0.28, -0.02 |
|                                    | <i>P-trend</i>                | 0.558     |              | 0.428     |              | 0.535     |              |
| Network size - Relatives           | None                          | -0.00     | -0.06, 0.06  | 0.02      | -0.04, 0.08  | 0.03      | -0.03, 0.08  |
|                                    | 1 or 2                        | Reference |              | Reference |              | Reference |              |
|                                    | 3 to 5                        | -0.00     | -0.08, 0.07  | -0.02     | -0.09, 0.05  | -0.01     | -0.08, 0.06  |
|                                    | More than 5                   | 0.09      | -0.06, 0.24  | 0.03      | -0.11, 0.17  | 0.03      | -0.11, 0.17  |
|                                    | <i>P-trend</i>                | 0.560     |              | 0.444     |              | 0.373     |              |
| Contact frequency - Friends        | No friends                    | -0.15     | -0.24, -0.05 | -0.10     | -0.19, -0.01 | -0.02     | -0.10, 0.07  |
|                                    | Less than once a month        | Reference |              | Reference |              | Reference |              |
|                                    | About once a month            | 0.07      | 0.01, 0.14   | 0.05      | -0.01, 0.11  | 0.05      | -0.01, 0.11  |
|                                    | Several times a month         | -0.01     | -0.08, 0.06  | -0.00     | -0.07, 0.06  | -0.01     | -0.07, 0.06  |
|                                    | About once a week             | 0.01      | -0.07, 0.08  | 0.01      | -0.05, 0.08  | 0.03      | -0.04, 0.09  |
|                                    | Several times a week          | -0.06     | -0.14, 0.02  | -0.02     | -0.12, 0.02  | -0.01     | -0.08, 0.06  |
| <i>P-trend</i>                     | 0.933                         |           | 0.919        |           | 0.986        |           |              |
| Contact frequency - Relatives      | No relatives                  | -0.04     | -0.19, 0.11  | -0.07     | -0.21, 0.07  | -0.05     | -0.19, 0.08  |
|                                    | Less than once a month        | Reference |              | Reference |              | Reference |              |
|                                    | About once a month            | -0.08     | -0.16, -0.00 | -0.09     | -0.17, -0.02 | -0.09     | -0.16, -0.02 |
|                                    | Several times a month         | 0.03      | -0.05, 0.11  | -0.01     | -0.08, 0.06  | -0.02     | -0.09, 0.05  |
|                                    | About once a week             | -0.01     | -0.08, 0.06  | -0.03     | -0.10, 0.03  | -0.03     | -0.10, 0.03  |
|                                    | Several times a week          | 0.01      | -0.06, 0.08  | -0.03     | -0.10, 0.04  | -0.04     | -0.11, 0.02  |
| <i>P-trend</i>                     | 0.252                         |           | 0.945        |           | 0.724        |           |              |

|                                          |                               | <b>Model 1*</b> |               | <b>Model 2†</b> |               | <b>Model 3‡</b> |               |
|------------------------------------------|-------------------------------|-----------------|---------------|-----------------|---------------|-----------------|---------------|
|                                          |                               | <b>b</b>        | <b>95% CI</b> | <b>b</b>        | <b>95% CI</b> | <b>b</b>        | <b>95% CI</b> |
| Participation<br>in social<br>activities | Never or not a member         | Reference       |               | Reference       |               | Reference       |               |
|                                          | At least several times a year | 0.12            | 0.04, 0.20    | 0.08            | 0.01, 0.16    | 0.01            | -0.06, 0.08   |
|                                          | Several times a month or more | 0.20            | 0.12, 0.28    | 0.15            | 0.08, 0.23    | 0.07            | -0.00, 0.14   |
|                                          | <i>P-trend</i>                | <0.001          |               | <0.001          |               | 0.084           |               |

\*Adjusted for country, age and sex.

†Adjusted for country, age, sex and baseline cognitive function.

‡Adjusted for country, age, sex, baseline cognitive function, education, household amenities, work status, marital status, smoking status, alcohol drinking frequency, alcohol intake, physical activity, self-rated health, number of chronic diseases and depressive symptoms.
