# Supplementary material for: Social networks and cognitive function in older adults: findings from the HAPIEE study
Source: PubMed Central journal article supplement (PMC8524850; doi:10.1186/s12877-021-02531-0), 2021-10-18
Supplement: 12877_2021_2531_MOESM5_ESM.pdf [file 12877_2021_2531_MOESM5_ESM.pdf]

**Additional File 5. Comparison of baseline study characteristics between complete (n=6,691 and n=4,624) and incomplete (n=11,920) cases**

| % or Mean (SD) for measures at baseline (2002/2005) | Complete cases* | Incomplete cases | P-value of sample differences** |
|-----------------------------------------------------|-----------------|------------------|---------------------------------|
| Immediate recall (0-30)                             | 20.8 (4.3)      | 20.3 (4.4)       | P<0.001                         |
| Delayed recall (0-10)                               | 7.0 (1.9)       | 6.8 (2.0)        | P<0.001                         |
| Verbal fluency                                      | 20.6 (6.9)      | 20.0 (6.8)       | P<0.001                         |
| Processing speed (0-65)                             | 17.7 (5.5)      | 17.3 (5.5)       | P<0.001                         |
| Country                                             |                 |                  | P<0.001                         |
| Czech Republic                                      | 30.9%           | 30.2%            |                                 |
| Poland                                              | 34.0%           | 33.8%            |                                 |
| Russia                                              | 35.1%           | 36.0%            |                                 |
| Age (years)                                         | 62.2 (6.0)      | 62.4 (5.9)       | P<0.001                         |
| Female                                              | 53.7%           | 53.0%            | P<0.001                         |
| Network size of friends                             |                 |                  | P<0.001                         |
| None                                                | 46.5%           | 50.6%            |                                 |
| 1 or 2                                              | 35.3%           | 32.8%            |                                 |
| 3 to 5                                              | 14.3%           | 13.0%            |                                 |
| More than 5                                         | 4.0%            | 3.5%             |                                 |
| Network size of relatives                           |                 |                  |                                 |
| None                                                | 40.5%           | 43.6%            |                                 |
| 1 or 2                                              | 35.3%           | 34.7%            |                                 |
| 3 to 5                                              | 20.6%           | 18.5%            |                                 |
| More than 5                                         | 3.6%            | 3.3%             |                                 |
| Contact frequency with friends                      |                 |                  | P<0.001                         |
| No friends                                          | 6.7%            | 8.0%             |                                 |
| Less than once a month                              | 26.7%           | 29.1%            |                                 |
| About once a month                                  | 21.7%           | 20.4%            |                                 |
| Several times a month                               | 16.3%           | 15.2%            |                                 |
| About once a week                                   | 16.4%           | 15.6%            |                                 |
| Several times a week                                | 12.2%           | 11.8%            |                                 |
| Contact frequency with relatives                    |                 |                  |                                 |
| No relatives                                        | 2.6%            | 2.9%             |                                 |
| Less than once a month                              | 18.6%           | 21.1%            |                                 |
| About once a month                                  | 14.1%           | 14.3%            |                                 |
| Several times a month                               | 14.5%           | 13.8%            |                                 |
| About once a week                                   | 24.5%           | 23.4%            |                                 |
| Several times a week                                | 25.8%           | 24.6%            |                                 |
| Participation in social activities                  |                 |                  | P<0.001                         |
| Never or not a member                               | 81.8%           | 84.3%            |                                 |
| At least several times a year                       | 8.8%            | 7.7%             |                                 |
| Several times a month or more                       | 9.4%            | 8.0%             |                                 |
| Educational level                                   |                 |                  | P<0.001                         |
| Primary or lower                                    | 9.6%            | 13.4%            |                                 |
| Vocational                                          | 26.2%           | 26.7%            |                                 |
| Secondary                                           | 37.0%           | 35.8%            |                                 |
| University                                          | 27.3%           | 24.1%            |                                 |
| Number of household amenities (0-12)                | 6.3 (2.2)       | 6.1(2.2)         | P<0.001                         |
| Not working                                         | 64.6%           | 67.1%            | P<0.001                         |
| Not partnered                                       | 25.6%           | 27.1%            | P<0.001                         |
| Smoking status                                      |                 |                  | P<0.001                         |
| Current                                             | 20.4%           | 22.7%            |                                 |
| Former                                              | 25.2%           | 25.2%            |                                 |
| Never                                               | 54.3%           | 52.1%            |                                 |
| Alcohol drinking frequency                          |                 |                  | P<0.001                         |
| Never                                               | 21.5%           | 24.0%            |                                 |
| <1/month                                            | 29.9%           | 30.0%            |                                 |
| 1-3/month                                           | 20.3%           | 19.4%            |                                 |
| 1-4/week                                            | 21.9%           | 20.6%            |                                 |
| More than 5/week                                    | 6.4%            | 6.0%             |                                 |
| Alcohol intake per week (grams)                     | 2580.7 (6134.5) | 2544.4 (6386.9)  | P<0.001                         |

| <b>% or Mean (SD) for measures at baseline (2002/2005)</b> | <b>Complete cases*</b> | <b>Incomplete cases</b> | <b>P-value of sample differences**</b> |
|------------------------------------------------------------|------------------------|-------------------------|----------------------------------------|
| Physical activity per week (hours)                         | 21.2 (14.3)            | 20.1 (14.2)             | P<0.001                                |
| Self-rated health                                          |                        |                         | P<0.001                                |
| Very poor or poor                                          | 14.5%                  | 16.9%                   |                                        |
| Fair                                                       | 59.6%                  | 59.4%                   |                                        |
| Very good or good                                          | 26.0%                  | 23.7%                   |                                        |
| Number of chronic diseases (0-4)                           | 3.7 (0.6)              | 3.6 (0.7)               | P<0.001                                |
| CES-D 20 score (0-60)                                      | 10.9 (7.9)             | 11.1 (8.1)              | P<0.001                                |

*Note:* Covariate baseline data on age, sex, and country were complete for all participants.

\*Complete case estimates are based on the analytic sample for frequency of contact with social network members and participation in social activities (n=6,691), with exception to baseline frequencies on social network size which was calculated using the sub-sample of participants with these data (n=4,624).

\*\*Proportion and mean differences between complete and incomplete cases were compared using chi-squared tests and t-tests.
