# Supplementary material for: Social networks and cognitive function in older adults: findings from the HAPIEE study
Source: PubMed Central journal article supplement (PMC8524850; doi:10.1186/s12877-021-02531-0), 2021-10-18
Supplement: 12877_2021_2531_MOESM6_ESM.pdf [file 12877_2021_2531_MOESM6_ESM.pdf]

**Additional File 6. Comparison of country, age, and sex adjusted cross-sectional associations between social network characteristics and global cognition among complete (n=6,691 and n=4,624) and incomplete cases due to loss to follow-up (n=10,440 and 7,365)**

| Social network measure             |                               | Complete cases |              | Incomplete cases* |              |
|------------------------------------|-------------------------------|----------------|--------------|-------------------|--------------|
|                                    |                               | b              | 95% CI       | b                 | 95% CI       |
| Network size – Friends             | None                          | 0.01           | -0.05, 0.06  | -0.03             | -0.07, 0.01  |
|                                    | 1 or 2                        | Reference      |              | Reference         |              |
|                                    | 3 to 5                        | 0.08           | 0.01, 0.15   | 0.09              | 0.04, 0.15   |
|                                    | More than 5                   | 0.18           | 0.06, 0.30   | 0.17              | 0.07, 0.27   |
|                                    | <i>P-trend</i>                | 0.003          |              | <0.001            |              |
| Network size – Relatives           | None                          | 0.00           | -0.05, 0.05  | 0.00              | -0.04, 0.04  |
|                                    | 1 or 2                        | Reference      |              | Reference         |              |
|                                    | 3 to 5                        | 0.04           | -0.02, 0.11  | 0.05              | 0.00, 0.10   |
|                                    | More than 5                   | 0.16           | 0.03, 0.28   | 0.13              | 0.03, 0.23   |
|                                    | <i>P-trend</i>                | 0.010          |              | 0.010             |              |
| Contact frequency - Friends        | No friends                    | -0.12          | -0.30, -0.05 | -0.13             | -0.19, -0.07 |
|                                    | Less than once a month        | Reference      |              | Reference         |              |
|                                    | About once a month            | 0.06           | 0.01, 0.12   | 0.07              | 0.03, 0.11   |
|                                    | Several times a month         | 0.02           | -0.03, 0.08  | 0.08              | 0.03, 0.13   |
|                                    | About once a week             | 0.01           | -0.04, 0.07  | 0.04              | -0.01, 0.09  |
|                                    | Several times a week          | -0.03          | -0.10, 0.03  | 0.01              | -0.04, 0.07  |
|                                    | <i>P-trend</i>                | 0.490          |              | 0.001             |              |
| Contact frequency - Relatives      | No relatives                  | -0.01          | -0.13, 0.11  | -0.08             | -0.18, 0.01  |
|                                    | Less than once a month        | Reference      |              | Reference         |              |
|                                    | About once a month            | -0.02          | -0.08, 0.05  | 0.02              | -0.03, 0.07  |
|                                    | Several times a month         | 0.10           | 0.04, 0.17   | 0.10              | 0.05, 0.15   |
|                                    | About once a week             | 0.05           | -0.01, 0.11  | 0.07              | 0.03, 0.12   |
|                                    | Several times a week          | 0.05           | -0.01, 0.11  | 0.04              | -0.01, 0.09  |
|                                    | <i>P-trend</i>                | 0.017          |              | 0.002             |              |
| Participation in social activities | Never or not a member         | Reference      |              | Reference         |              |
|                                    | At least several times a year | 0.19           | 0.19         | 0.21              | 0.16, 0.27   |
|                                    | Several times a month or more | 0.22           | 0.22         | 0.28              | 0.23, 0.34   |
|                                    | <i>P-trend</i>                | <0.001         |              | <0.001            |              |

\*Incomplete case analyses due to loss to follow-up were performed on participants with baseline data on cognitive function (n=11,920) as well as social network characteristics and covariates. This amounted to 10,440 participants for the analyses on frequency of contact with social network members / participation in social activities and 7,365 participants for the analyses on social network size.
