# Supplementary material for: Social networks and cognitive function in older adults: findings from the HAPIEE study
Source: PubMed Central journal article supplement (PMC8524850; doi:10.1186/s12877-021-02531-0), 2021-10-18
Supplement: 12877_2021_2531_MOESM7_ESM.pdf [file 12877_2021_2531_MOESM7_ESM.pdf]

## Additional File 7. Cross-sectional associations of social network characteristics with global cognitive function in participants re-examined between 3-4 years of follow-up

| Social network measure                     | Model 1*  |              | Model 2†  |             |
|--------------------------------------------|-----------|--------------|-----------|-------------|
|                                            | b         | 95% CI       | b         | 95% CI      |
| <b>Network size of friends‡</b>            |           |              |           |             |
| None                                       | -0.02     | -0.08, 0.03  | -0.00     | -0.06, 0.05 |
| 1 or 2                                     | Reference |              | Reference |             |
| 3 to 5                                     | 0.07      | -0.01, 0.14  | 0.07      | -0.01, 0.14 |
| More than 5                                | 0.19      | 0.06, 0.31   | 0.14      | 0.02, 0.26  |
| <i>P-trend</i>                             | <0.001    |              | 0.011     |             |
| <b>Network size of relatives‡</b>          |           |              |           |             |
| None                                       | -0.03     | -0.08, 0.03  | -0.01     | -0.07, 0.04 |
| 1 or 2                                     | Reference |              | Reference |             |
| 3 to 5                                     | 0.05      | -0.02, 0.11  | 0.05      | -0.01, 0.11 |
| More than 5                                | 0.14      | 0.01, 0.27   | 0.11      | -0.02, 0.23 |
| <i>P-trend</i>                             | 0.004     |              | 0.017     |             |
| <b>Contact frequency with friends§</b>     |           |              |           |             |
| No friends                                 | -0.13     | -0.22, -0.04 | 0.01      | -0.07, 0.09 |
| Less than once a month                     | Reference |              | Reference |             |
| About once a month                         | 0.07      | 0.01, 0.12   | 0.04      | -0.01, 0.09 |
| Several times a month                      | 0.03      | -0.03, 0.10  | 0.02      | -0.04, 0.07 |
| About once a week                          | 0.03      | -0.03, 0.10  | 0.05      | -0.01, 0.11 |
| Several times a week                       | -0.02     | -0.09, 0.04  | 0.02      | -0.05, 0.08 |
| <i>P-trend</i>                             | 0.228     |              | 0.307     |             |
| <b>Contact frequency with relatives§</b>   |           |              |           |             |
| No relatives                               | -0.01     | -0.14, 0.12  | -0.02     | -0.14, 0.10 |
| Less than once a month                     | Reference |              | Reference |             |
| About once a month                         | 0.00      | -0.07, 0.07  | 0.00      | -0.06, 0.07 |
| Several times a month                      | 0.12      | 0.05, 0.19   | 0.10      | -0.04, 0.16 |
| About once a week                          | 0.07      | 0.01, 0.13   | 0.07      | 0.01, 0.12  |
| Several times a week                       | 0.06      | 0.00, 0.13   | 0.04      | -0.02, 0.09 |
| <i>P-trend</i>                             | 0.007     |              | 0.049     |             |
| <b>Participation in social activities§</b> |           |              |           |             |
| Never or not a member                      | Reference |              | Reference |             |
| At least several times a year              | 0.18      | 0.11, 0.25   | 0.07      | 0.00, 0.13  |
| Several times a month or more              | 0.21      | 0.14, 0.27   | 0.09      | 0.02, 0.15  |
| <i>P-trend</i>                             | <0.001    |              | 0.002     |             |

\*Adjusted for country, age and sex.

†Adjusted for country, age, sex, education, household amenities, work status, marital status, smoking status, alcohol drinking frequency, alcohol intake, physical activity, self-rated health, number of chronic diseases and depressive symptoms.

‡Results are based on 84.3% (n=3,900) of participants from the analytic sample for social network size who were re-examined between 3-4 years of follow-up.

§Results are based on 87.7% (n=5,868) of participants from the analytic sample for contact frequency and social activities who were re-examined between 3-4 years of follow-up.
