# Supplementary material for: Social networks and cognitive function in older adults: findings from the HAPIEE study
Source: PubMed Central journal article supplement (PMC8524850; doi:10.1186/s12877-021-02531-0), 2021-10-18
Supplement: 12877_2021_2531_MOESM9_ESM.pdf [file 12877_2021_2531_MOESM9_ESM.pdf]

**Additional File 9. Cross-sectional associations between social network characteristics and global cognitive function with Bonferroni corrected p-values**

| Social network measure                    | Model 1*     |                     |                  | Model 2†    |                   |              |
|-------------------------------------------|--------------|---------------------|------------------|-------------|-------------------|--------------|
|                                           | b            | 95% CI              | P-value‡         | b           | 95% CI            | P-value‡     |
| <b>Network size of friends</b>            |              |                     |                  |             |                   |              |
| None                                      | 0.01         | -0.05, 0.06         | 1.000            | 0.02        | -0.03, 0.07       | 1.000        |
| 1 or 2                                    | Reference    |                     |                  | Reference   |                   |              |
| 3 to 5                                    | 0.08         | 0.01, 0.15          | 1.000            | 0.08        | 0.01, 0.14        | 0.401        |
| More than 5                               | <b>0.18</b>  | <b>0.06, 0.30</b>   | <b>0.015</b>     | 0.13        | 0.02, 0.24        | 0.412        |
| <i>P-trend</i>                            | 0.003        |                     |                  | 0.036       |                   |              |
| <b>Network size of relatives</b>          |              |                     |                  |             |                   |              |
| None                                      | 0.00         | -0.05, 0.05         | 1.000            | 0.01        | -0.04, 0.06       | 1.000        |
| 1 or 2                                    | Reference    |                     |                  | Reference   |                   |              |
| 3 to 5                                    | 0.04         | -0.02, 0.11         | 0.840            | 0.05        | 0.00, 0.11        | 1.000        |
| More than 5                               | 0.16         | 0.03, 0.28          | 0.070            | 0.12        | 0.01, 0.24        | 0.614        |
| <i>P-trend</i>                            | 0.010        |                     |                  | 0.074       |                   |              |
| <b>Contact frequency with friends</b>     |              |                     |                  |             |                   |              |
| No friends                                | <b>-0.17</b> | <b>-0.20, -0.05</b> | <b>0.010</b>     | 0.01        | -0.06, 0.09       | 1.000        |
| Less than once a month                    | Reference    |                     |                  | Reference   |                   |              |
| About once a month                        | 0.06         | 0.01, 0.12          | 0.105            | 0.04        | -0.01, 0.08       | 1.000        |
| Several times a month                     | 0.02         | -0.03, 0.08         | 1.000            | 0.01        | -0.05, 0.06       | 1.000        |
| About once a week                         | 0.01         | -0.04, 0.07         | 1.000            | 0.03        | -0.03, 0.08       | 1.000        |
| Several times a week                      | -0.03        | -0.10, 0.03         | 1.000            | 0.01        | -0.05, 0.07       | 1.000        |
| <i>P-trend</i>                            | 0.490        |                     |                  | 0.655       |                   |              |
| <b>Contact frequency with relatives</b>   |              |                     |                  |             |                   |              |
| No relatives                              | -0.01        | -0.13, 0.11         | 1.000            | -0.01       | -0.13, 0.10       | 1.000        |
| Less than once a month                    | Reference    |                     |                  | Reference   |                   |              |
| About once a month                        | -0.02        | -0.08, 0.05         | 1.000            | 0.00        | -0.06, 0.06       | 1.000        |
| Several times a month                     | <b>0.10</b>  | <b>0.04, 0.17</b>   | <b>0.010</b>     | <b>0.09</b> | <b>0.03, 0.15</b> | <b>0.050</b> |
| About once a week                         | 0.05         | -0.01, 0.11         | 0.475            | 0.06        | 0.00, 0.11        | 0.696        |
| Several times a week                      | 0.05         | -0.01, 0.11         | 0.405            | 0.03        | -0.03, 0.08       | 1.000        |
| <i>P-trend</i>                            | 0.017        |                     |                  | 0.091       |                   |              |
| <b>Participation in social activities</b> |              |                     |                  |             |                   |              |
| Never or not a member                     | Reference    |                     |                  | Reference   |                   |              |
| At least several times a year             | <b>0.19</b>  | <b>0.12, 0.25</b>   | <b>&lt;0.001</b> | 0.07        | 0.01, 0.13        | 0.320        |
| Several times a month or more             | <b>0.22</b>  | <b>0.16, 0.29</b>   | <b>&lt;0.001</b> | <b>0.10</b> | <b>0.04, 0.16</b> | <b>0.016</b> |
| <i>P-trend</i>                            | <0.001       |                     |                  | <0.001      |                   |              |

\*Adjusted for country, age and sex.

†Adjusted for country, age, sex, education, household amenities, work status, marital status, smoking status, alcohol drinking frequency, alcohol intake, physical activity, self-rated health, number of chronic diseases and depressive symptoms.

‡P-values after Bonferroni correction for multiple testing. Emboldened estimates were statistically significant (p-value<0.05).
